# Supplementary material for: Pre-touch reaction is preferred over post-touch reaction in interaction with displayed agent
Source: PeerJ journal article supplement (doi:10.7717/peerj-cs.2277), 2024-08-23
Supplement: Pre-touch_Data.zip [file Pre-touch_Data.zip]

## Sheet: Data
ID	TF_A1	TF_A2	TF_A3	TF_A4	TF_A5	TF_L1	TF_L2	TF_L3	TF_L4	TF_L5	TF_HumanLikeness	TF_Naturalness	TF_TotalFeeling	TF_A	TF_L	TB_A1	TB_A2	TB_A3	TB_A4	TB_A5	TB_L1	TB_L2	TB_L3	TB_L4	TB_L5	TB_HumanLikeness	TB_Naturalness	TB_TotalFeeling	TB_A	TB_L	PF_A1	PF_A2	PF_A3	PF_A4	PF_A5	PF_L1	PF_L2	PF_L3	PF_L4	PF_L5	PF_HumanLikeness	PF_Naturalness	PF_TotalFeeling	PF_A	PF_L	PB_A1	PB_A2	PB_A3	PB_A4
1	2	2	5	3	2	3	4	4	4	5	5	3	3	2.8	4	3	3	3	3	3	4	4	3	4	4	3	2	4	3	3.8	5	5	6	5	6	6	7	6	6	6	6	7	6	5.4	6.2	6	6	6	6
2	7	4	7	5	7	7	7	4	6	7	7	5	6	6	6.2	4	3	6	4	4	6	5	4	5	6	6	3	6	4.2	5.2	6	7	7	7	7	4	5	4	6	5	7	3	6	6.8	4.8	7	7	7	7
3	3	3	3	3	4	4	4	3	4	4	3	3	4	3.2	3.8	4	4	4	4	4	4	5	4	4	4	4	5	5	4.23077	4.2	4	4	3	3	4	4	4	4	4	4	3	5	4	3.84615	4	5	5	4	5
4	3	2	2	2	2	4	5	4	5	5	4	5	5	2.2	4.6	4	3	4	3	3	5	5	4	5	5	5	3	5	4.15385	4.8	5	4	4	3	4	4	5	4	5	5	5	5	5	4.46154	4.6	5	5	4	4
5	3	3	4	3	6	6	6	6	6	6	4	6	6	3.8	6	6	2	3	2	6	6	6	6	5	6	3	6	6	4.84615	5.8	4	4	5	3	6	6	6	6	6	6	4	6	6	5.23077	6	4	3	3	4
6	4	4	5	3	4	4	4	4	4	4	4	5	4	4	4	3	3	3	3	3	2	3	2	2	3	3	3	3	2.76923	2.4	5	6	6	5	6	3	3	3	3	3	3	3	3	4	3	5	5	6	5
7	2	2	3	2	2	2	2	2	3	4	2	5	3	2.2	2.6	4	3	3	3	2	3	3	4	4	4	2	3	3	3.15385	3.6	2	2	3	2	2	3	2	4	4	4	3	4	3	2.92308	3.4	2	2	3	2
8	3	4	5	5	3	4	3	4	5	5	5	5	4	4	4.2	3	4	4	4	4	4	4	3	3	4	4	4	4	3.76923	3.6	5	5	5	6	5	5	5	5	5	5	5	6	6	5.23077	5	6	6	6	6
9	4	4	3	4	4	4	3	4	4	4	4	5	4	3.8	3.8	3	3	2	2	2	3	2	4	3	4	3	4	3	2.92308	3.2	3	3	3	2	3	4	3	4	4	4	3	2	3	3.15385	3.8	3	3	2	2
10	5	5	6	5	6	5	5	4	5	5	5	5	5	5.4	4.8	5	5	6	6	5	6	6	5	6	6	6	5	6	5.61538	5.8	6	6	7	6	7	6	6	5	6	6	6	6	6	6.07692	5.8	6	6	6	6
11	3	3	2	3	3	4	3	4	4	4	3	2	4	2.8	3.8	3	3	3	2	3	4	3	4	4	4	3	1	3	3.07692	3.8	5	5	5	4	4	5	5	5	4	5	5	4	4	4.61538	4.8	4	4	4	4
12	3	3	2	3	3	4	3	4	4	4	3	3	3	2.8	3.8	2	2	2	2	2	4	3	2	4	4	2	1	3	2.53846	3.4	3	3	3	3	3	4	4	4	4	4	4	5	4	3.69231	4	5	4	3	4
13	5	5	5	5	5	5	5	5	5	5	5	4	5	5	5	2	2	2	2	1	3	3	4	3	4	2	2	3	2.53846	3.4	4	3	5	4	4	4	4	4	4	4	5	5	5	4.23077	4	6	6	6	6
14	3	3	4	2	4	3	3	3	4	4	2	1	4	3.2	3.4	2	1	2	1	2	4	5	4	6	4	1	1	5	2.92308	4.6	3	2	2	2	2	5	4	4	5	4	3	3	5	3.38462	4	5	4	5	5
15	5	5	3	4	4	5	5	4	4	4	4	3	5	4.2	4.4	5	5	4	5	5	5	5	4	4	4	3	3	5	4.38462	4.4	5	5	4	4	5	5	5	4	4	4	5	6	5	4.69231	4.4	5	5	4	3
16	2	2	1	2	2	4	1	3	3	4	1	4	2	1.8	3	2	1	1	1	2	4	2	4	4	4	1	2	2	2.30769	3.6	3	2	2	1	2	3	1	2	3	4	1	3	1	2.15385	2.6	2	2	1	1
17	3	3	3	3	3	2	2	2	2	3	3	2	2	3	2.2	4	4	4	4	3	3	3	3	3	3	3	3	3	3.30769	3	4	4	4	3	4	4	4	4	4	4	4	5	5	4.07692	4	4	4	5	3
18	6	6	5	6	6	6	6	5	7	7	7	7	6	5.8	6.2	5	5	5	6	6	6	6	6	6	6	6	7	6	5.84615	6	4	2	3	3	5	5	4	4	5	4	3	2	4	3.69231	4.4	4	4	4	4
19	5	5	5	4	5	5	5	4	4	4	5	6	5	4.8	4.4	5	4	5	4	4	4	5	4	4	4	5	5	5	4.46154	4.2	6	6	6	5	6	5	5	5	5	6	6	7	6	5.69231	5.2	6	5	5	6
20	5	5	6	5	4	5	5	5	5	5	3	3	5	5	5	4	4	6	5	3	4	3	4	5	4	2	2	4	3.84615	4	6	6	6	5	5	5	6	5	5	6	5	7	6	5.61538	5.4	6	4	5	2
21	5	4	5	4	4	4	5	5	4	4	4	4	4	4.4	4.4	5	5	5	5	4	4	5	5	5	5	5	5	4	4.76923	4.8	5	5	5	5	5	5	4	4	4	5	5	5	5	4.76923	4.4	4	4	5	4
22	2	4	1	1	4	2	2	2	2	2	2	1	1	2.4	2	3	4	4	2	6	4	4	5	5	5	6	7	5	4.61538	4.6	5	5	7	6	7	6	6	5	7	7	7	7	7	6.30769	6.2	1	6	7	4
23	2	2	2	3	5	2	2	3	4	5	1	1	3	2.8	3.2	3	3	3	2	5	4	3	3	4	3	1	2	3	3	3.4	5	7	6	7	6	7	6	6	6	6	6	6	6	6.15385	6.2	7	7	6	6
24	6	5	4	4	6	5	5	4	5	6	4	6	6	5	5	6	5	4	4	6	5	5	4	6	6	5	6	6	5.23077	5.2	5	4	4	3	6	5	5	3	5	6	4	5	5	4.61538	4.8	3	3	4	2
25	3	2	3	2	4	6	5	5	5	6	5	5	5	2.8	5.4	3	3	4	5	4	6	6	5	5	6	5	5	6	4.84615	5.6	4	3	3	3	4	6	6	5	5	6	5	3	6	4.53846	5.6	3	2	2	3
26	3	2	2	2	2	3	2	3	3	3	2	4	4	2.2	2.8	3	4	3	3	3	4	3	4	4	4	5	5	4	3.76923	3.8	6	6	5	5	5	6	4	4	6	6	6	6	6	5.46154	5.2	5	5	4	5
27	5	4	5	4	6	6	6	6	6	6	2	6	7	4.8	6	5	6	6	6	6	6	6	5	5	6	6	6	6	5.76923	5.6	5	4	5	3	5	6	6	6	6	6	3	3	6	4.92308	6	4	4	5	5
28	2	2	2	2	2	3	2	3	4	4	2	2	2	2	3.2	3	2	2	2	2	3	2	3	4	3	2	1	2	2.38462	3	3	3	4	4	5	4	4	4	4	4	4	5	4	4	4	5	5	5	5
29	4	3	3	3	3	4	3	4	4	4	4	3	4	3.2	3.8	3	3	4	4	4	4	4	4	4	4	4	3	4	3.76923	4	5	5	5	5	5	4	4	4	4	4	5	5	5	4.61538	4	4	4	3	4
30	3	2	2	2	3	4	3	3	3	3	3	2	3	2.4	3.2	4	4	4	4	4	4	4	4	4	5	5	2	3	3.92308	4.2	6	6	5	5	6	6	6	5	5	6	6	6	6	5.69231	5.6	5	5	5	5
The first character indicates touch factor information. T: "touch reaction", P: "pre-touch reaction"
The second character indicates distance factor information. F: "20 cm", B: "45 cm"
The character after the underbar indicates the types of questionnaires. Ax indicates anthropomorphism items ("A" indicates the average value). Lx indicates likeability items ("L" indicates the average value).
[truncated: 11 more columns]
